# Supplementary material for: Molecular Heterogeneity in Pediatric Malignant Rhabdoid Tumors in Patients With Multi-Organ Involvement
Source: Front Oncol. 2022 Jul 13;12:932337. doi: 10.3389/fonc.2022.932337 (PMC9326117; doi:10.3389/fonc.2022.932337)
Supplement: Supplementary Table 1 — Exome sequencing metrics. Top: the 10 samples obtained from individuals are listed along with the type of tissue (tumor or comparator), sample type, mean depth of target exon coverage, and percent of targeted bases per gene sequenced to 20× coverage. Bottom: metrics from RNA-sequencing. The seven samples upon which RNA-seq was performed are listed along with tumor type, sample preservation type, total number of reads, number of reads mapped to GRCh38, and number of coding and untranslated region reads. The corresponding dbGap ID for each sample is listed. FFPE, formalin-fixed paraffin-embedded; GRCh38, human genome assembly (hg38) from Genome Reference Consortium; UTR, untranslated region [file Table_1.xlsx]

## Sheet: Table S1
DNA exome sequencing
Patient ID	Tissue Type	Sample Type	Targeted Exon Coverage Mean	Coverage at 20x	dbGap ID
Patient 1	comparator normal	blood	265.5	0.97	IGMCH0112_S-190726-00039
Patient 1	tumor brain, primary	frozen	289.4	0.986	IGMCH0112_S-190725-00025
Patient 1	tumor kidney, primary	FFPE	266.4	0.982	IGMCH0112_S-190730-00011
Patient 1	tumor lung, metastatic	frozen	205.5	0.97	IGMCH0112_S-200323-00013
Patient 2	normal kidney, uninvolved	FFPE	186.3	0.984	IGMCH0117_S-190919-00016
Patient 2	tumor kidney, primary	FFPE	181.4	0.982	IGMCH0117_S-190919-00014
Patient 2	tumor brain, primary	frozen	200.9	0.986	IGMCH0117_S-190919-00061
Patient 3	comparator normal	blood	197.5	0.97	IGMCH0118_S-190624-00047
Patient 3	tumor kidney, primary	frozen	282	0.986	IGMCH0118_S-190808-00048
Patient 3	tumor abdomen, metastatic	frozen	262.9	0.97	IGMCH0118_S-200508-00048
RNA sequencing
Patient ID	Tissue Type	Sample Type	Total Reads	Mapped Reads (to GRCh38)	Mapped %	coding+UTR reads	coding+UTR%	dbGap ID
Patient 1	tumor brain, primary	frozen	227944071	208432038	0.9144	113465954	0.5444	IGMCH0112_S-190802-00012
Patient 1	tumor kidney, primary	FFPE	221345896	204171579	0.9224	72474824	0.355	IGMCH0112_S-190802-00013
Patient 1	tumor lung, metastatic	frozen	108144185	88624441	0.8195	22308402	0.2517	IGMCH0112_S-200401-00041
Patient 2	tumor kidney, primary	FFPE	100720174	94245199	0.9357	23685582	0.2513	IGMCH0117_S-190926-00022
Patient 2	tumor brain, primary	frozen	124230352	112860314	0.9085	41425010	0.367	IGMCH0117_S-190926-00024
Patient 3	tumor kidney, primary	frozen	220779716	193640136	0.8771	102722640	0.5305	IGMCH0118_S-190813-00021
Patient 3	tumor abdomen, metastatic	frozen	81471138	70096240	0.8604	31286296	0.4463	IGMCH0118_S-200518-00029
